# Supplementary material
Source: PubMed Central journal article supplement (PMC10860714)
Supplement: NIHMS1962405-supplement-sm.pdf [file NIHMS1962405-supplement-sm.pdf]

Supplementary Materials for

**A meta-analysis suggests that tACS improves cognition in healthy, aging, and psychiatric populations**

Shrey Grover *et al.*

Corresponding author: Robert M. G. Reinhart, [rmgr@bu.edu](mailto:rmgr@bu.edu)

*Sci. Transl. Med.* **15**, eabo2044 (2023)  
DOI: 10.1126/scitranslmed.abo2044

**The PDF file includes:**

Materials and Methods  
Figs. S1 to S7  
Tables S1 to S12

**Other Supplementary Material for this manuscript includes the following:**

Data file S1

## **Supplementary Materials and Methods**

*Categorization of effects in clinical studies.* For some studies in clinical populations, effects could be categorized into one of the nine cognitive domains (for example, examination of working memory in schizophrenia). For other studies in clinical populations, the effect of interest is not explicitly categorizable into a single cognitive domain (for instance, examination of comprehensive neuropsychiatric assessments such as Montreal Cognitive Assessment scores in Parkinson's disease patients) or may reflect a characteristic symptom dimension unique to a clinical disorder (for example, auditory hallucination symptoms in schizophrenia). To maximize inclusivity in our assessment of the effectiveness of tACS, we included these effects under the umbrella of 'Neuropsychiatric Assessments' and 'Clinical Symptoms', respectively.

*Grouping of effects for meta-analytic effect size estimation.* The overall meta-analytic *Outcome-Based* and *Hypothesis-Based* effect sizes of tACS were determined across all effect sizes extracted during search. These included effects belonging to all nine cognitive domains in healthy populations, effects belonging to any cognitive domain in clinical populations, as well as clinical symptom and neuropsychiatric assessment measures in clinical populations. Results from these analyses are reported in the main

text. Exclusion of effects in clinical populations did not change the pattern of results in these omnibus analyses.

*Grouping of effects when examining cognitive domains separately.* When examining the effect size within the nine cognitive domains separately, we included effects in both healthy and clinical populations to maximize inclusivity. Exclusion of clinical studies did not significantly alter the pattern of results for these analyses, except reducing the significant effect of tACS on Attention Performance measures before outlier removal to a trend level (**Table S10**).

*Grouping of effects for meta-regression analyses.* Meta-regression analyses at the omnibus level included all extracted effects, including clinical effects. Exclusion of clinical effects did not significantly alter the pattern of results, except reducing the effect of Intensity on RT measures to a trend level (**Table S10**). Regression analyses could be performed for the working memory, long-term memory, attention, executive control and intelligence domains as these domains had sufficient numbers of effects ( $\geq 10$  per covariate, as recommended by (31)). For these domains, exclusion of effects in clinical populations produced the following changes: 1) they reduced the significant influence of modulation frequency on All working memory measures after outlier removal to a trend level (**Table S10**), and 2) the effect of modulation intensity on All, Performance and RT executive control measures after outlier removal became significant (**Table S10**).

*Grouping of effects for subgroup analyses on phase.* For examination of bidirectional effects of in-phase and anti-phase multisite tACS, all effects observed for experiments explicitly hypothesizing improvement of function with in-phase tACS and impairments in function with anti-phase tACS were included. No studies employing such protocols in clinical populations were identified.

*Grouping of effects for subgroup analyses in older adults and clinical populations.*

Effects across healthy, older adults were separately analyzed to determine the effectiveness of tACS in older populations. In studies with clinical populations, effects on cognitive functions (belonging to any of the nine cognitive domains) and on clinical symptoms were separately analyzed. The effects on cognitive functions were examined together (“All”) as well as separately for performance-based effects (“Performance”) and RT-based effects (“RT”). Effects on neuropsychiatric symptoms were not analyzed quantitatively since they belonged to a single study but were included in the omnibus analyses (see above).

## Supplementary Figures

**Figure S1 | Flowchart of literature search and study selection.**

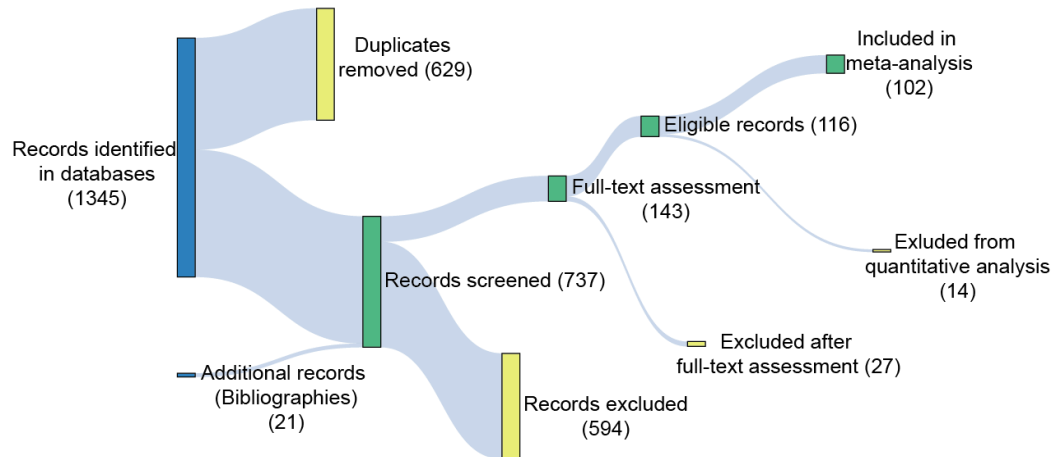

Of the 1345 records identified during search, 737 records remained after removing duplicates (same study appearing multiple times in different databases or with different search queries). Of these, 143 records qualified for a full-text assessment. 116 records were identified as eligible of which 102 records were included in the quantitative meta-analysis. 14 records were excluded due to data unavailability.

Figure S2 | Treemap of outcome-based effects included in the meta-analysis

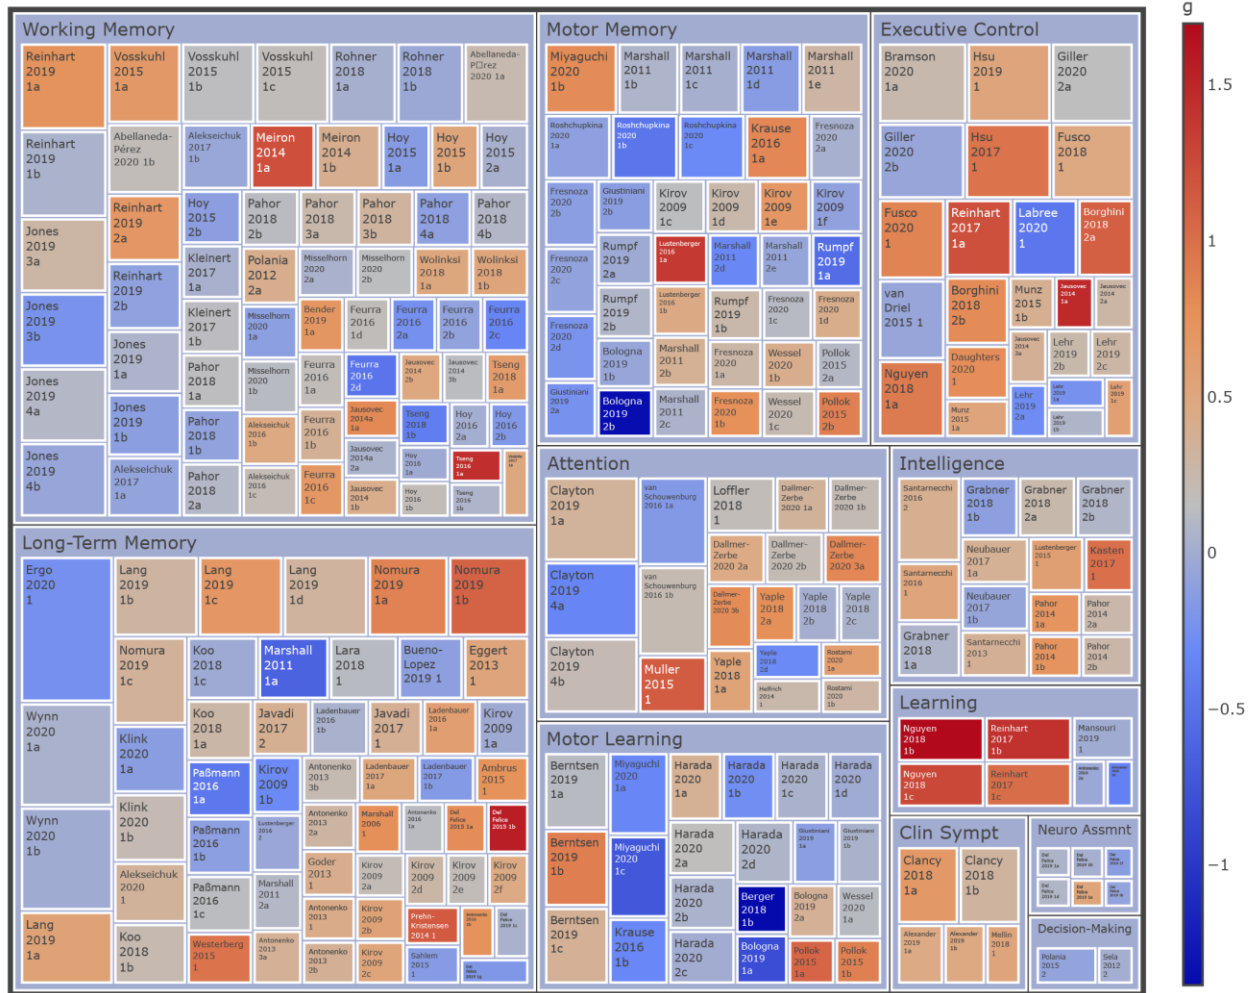

Each box represents an experiment, the color of the box reflects the effect size Hedges' g, the size of the box represents the sample size. The Hedges' g visualized here reflects the outcome-based effect size for 265 out of the 304 experiments. These experiments were either exploratory or explicitly tested whether tACS improved a cognitive outcome. Accordingly, positive values of Hedges' g here reflect an improvement in cognitive function, while negative values reflect an impairment. The remaining 39 experiments tested whether tACS disrupts cognitive function. Effect sizes for these "hypothesized disruption" experiments are provided in Figure S3 in the Supplementary Materials. The experimental and tACS parameters for each experiment can be accessed in Data File S1.

**Figure S3 | Treemap of experiments hypothesizing disruption in cognitive function.**

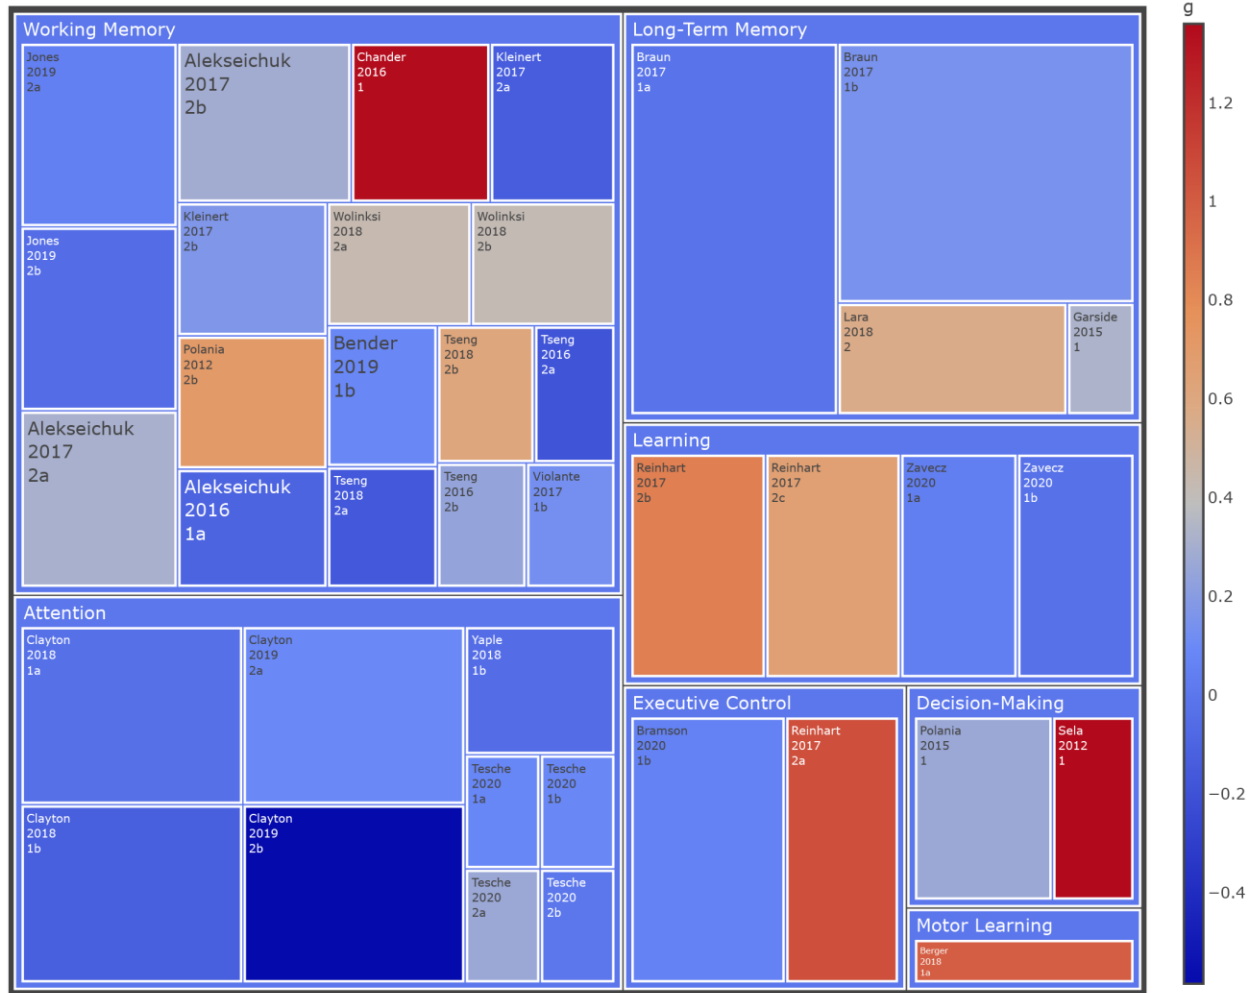

Each box represents an experiment, the color of the box reflects the effect size Hedges'  $g$ , the size of the box represents the sample size. The Hedges'  $g$  visualized here reflects the hypothesized-based effect size for 39 out of the 304 experiments, which explicitly hypothesized a disruption in cognitive function. Positive values reflect the degree of agreement with the hypothesis. In other words, a positive effect size reflects an impairment in cognitive function, as hypothesized, while a negative effect size reflects an improvement in cognitive function, contrary to the hypothesis. For the other 265 experiments which were either exploratory in nature or which explicitly hypothesized an improvement in cognitive function, both outcome-based and hypothesis-based analyses yield the same values, and these are reported in **Figure S2**. The experimental and tACS design parameters for each experiment can be accessed in **Data File S1**.

**Figure S4 | Summary of effects on All outcomes in cognitive domains before outlier removal**

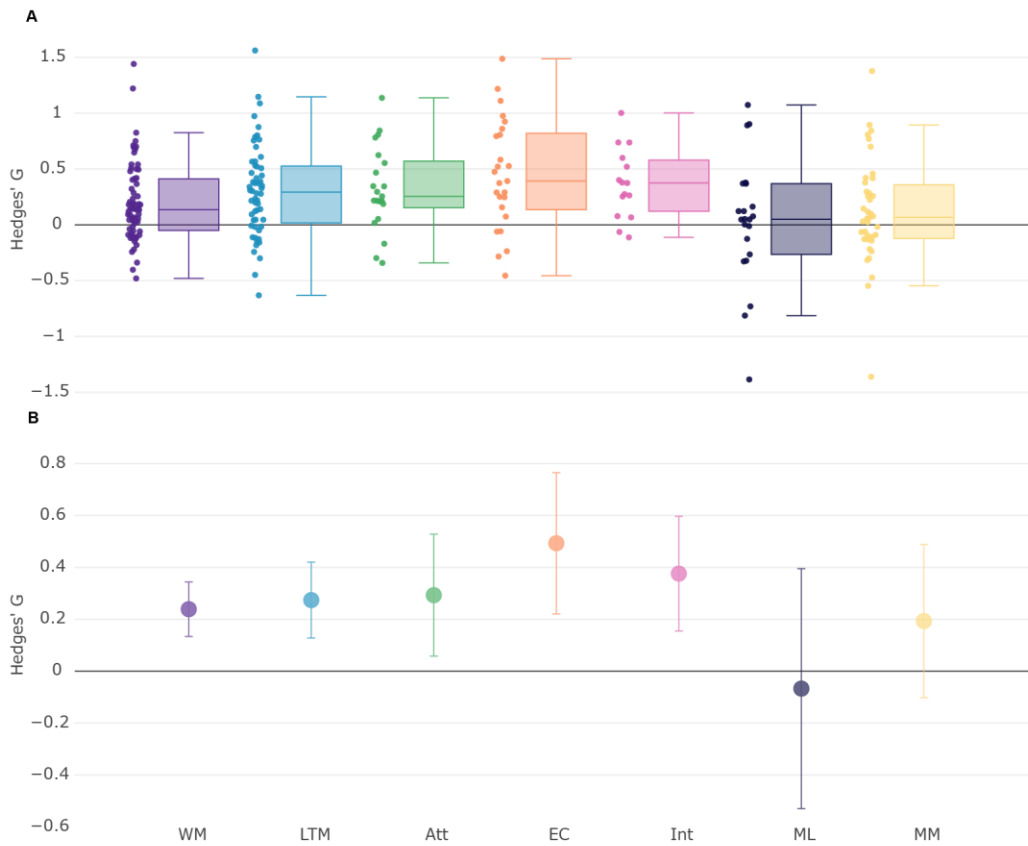

**(A)** Box plots of outcome-based effect size estimates in cognitive domains. Individual points represent individual effect size point estimates for each experiment within a specific domain. **(B)** Overall effect size estimates in cognitive domains with the corresponding 95% confidence intervals. All plots show data before outlier removal. Boxplot center, median; box limits, upper and lower quartiles; whiskers, maximum and minimum values. WM, working memory; LTM, long-term memory; Att, attention; EC, executive control; Int, intelligence; ML, motor learning; MM, motor memory.



**Figure S5: Risk of bias assessments for randomized controlled trials**

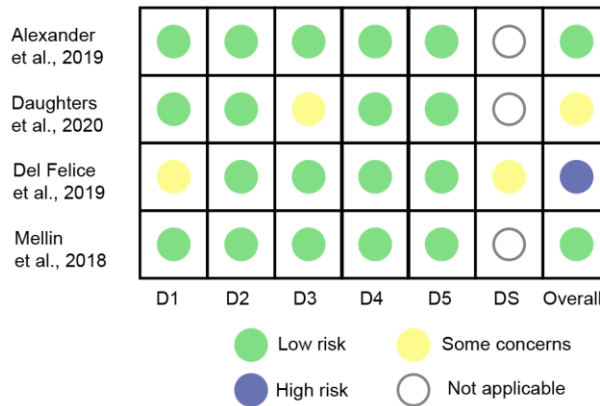

For each randomized controlled trial, the risk of bias in each of the six possible domains and overall risk determined using the Cochrane Risk of Bias tool (RoB 2.0; see **Methods**) is shown. D1: Risk of bias arising from the randomization process; D2: Risk of bias due to deviations from the intended interventions; D3: Missing outcome data; D4: Risk of bias in measurement of the outcome; D5: Risk of bias in selection of the reported result; DS: Risk of bias arising from period and carryover effects in crossover trials (not applicable to studies with between-subjects designs). For risk of bias assessment of non-RCTs, please see **Figure S6**.

**Figure S6 | Risk of bias assessment summary plot for non-RCTs**

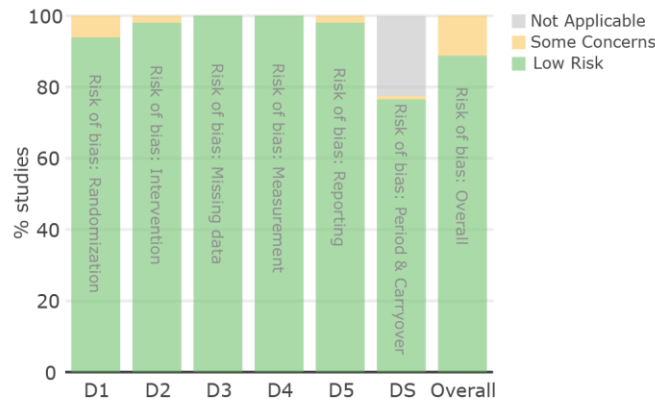

The bars represent the percentage of non-RCT studies in each risk category in five risk of bias domains and overall risk of bias assessment determined using the accommodated version of the Cochrane Risk of Bias tool (RoB 2.0; see **Methods**). D1: Risk of bias arising from the randomization process; D2: Risk of bias due to deviations from the intended interventions; D3: Missing outcome data; D4: Risk of bias in measurement of the outcome; D5: Risk of bias in selection of the reported result; DS: Risk of bias arising from period and carryover effects in crossover trials (not applicable to studies with between-subjects designs).

**Figure S7 | Publication bias funnel plots**

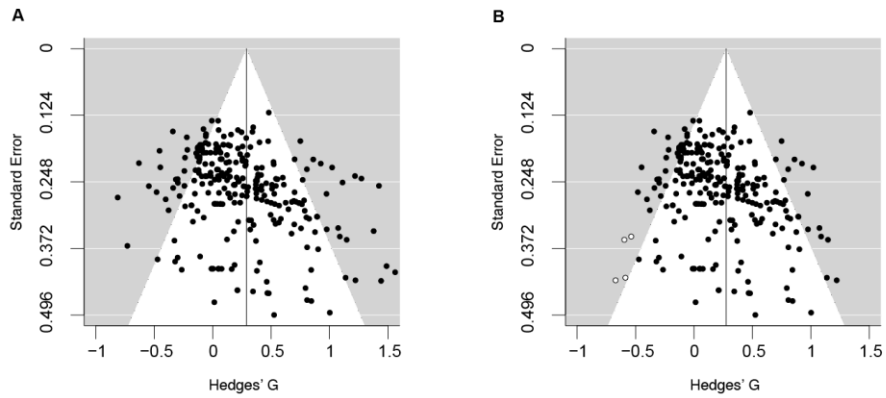

**(A)** Funnel plot of effect sizes against their standard errors. **(B)** Funnel plot of effect sizes against their standard errors after exclusion of the outliers and trim-and-fill procedure. Black filled dots represent individual effect sizes included in the meta-analysis, empty dots represent the effect sizes imputed by the trim-and-fill procedure. The line in the center of the funnel represents the overall effect size estimate.

## Supplementary Tables

**Table S1: Sensitivity to correlation between dependent effects**

| Outcome-Based Analysis |           |            |        |         | Hypothesis-Based Analysis |            |        |         |
|------------------------|-----------|------------|--------|---------|---------------------------|------------|--------|---------|
| r                      | Hedges' G | Std. Error | Tau.sq | p       | Hedges' G                 | Std. Error | Tau.sq | p       |
| <b>Overall Effect</b>  |           |            |        |         |                           |            |        |         |
| 0                      | 0.2887    | 0.0387     | 0.1129 | <0.0001 | 0.3155                    | 0.0386     | 0.0976 | <0.0001 |
| 0.2                    | 0.2887    | 0.0387     | 0.1129 | <0.0001 | 0.3156                    | 0.0386     | 0.0977 | <0.0001 |
| 0.4                    | 0.2887    | 0.0387     | 0.113  | <0.0001 | 0.3156                    | 0.0386     | 0.0977 | <0.0001 |
| 0.6                    | 0.2887    | 0.0387     | 0.113  | <0.0001 | 0.3156                    | 0.0386     | 0.0978 | <0.0001 |
| 0.8                    | 0.2887    | 0.0387     | 0.1131 | <0.0001 | 0.3156                    | 0.0386     | 0.0979 | <0.0001 |
| 1                      | 0.2887    | 0.0387     | 0.1131 | <0.0001 | 0.3156                    | 0.0386     | 0.0979 | <0.0001 |
| <b>Performance</b>     |           |            |        |         |                           |            |        |         |
| 0                      | 0.2999    | 0.0434     | 0.1097 | <0.0001 | 0.3079                    | 0.0432     | 0.0881 | <0.0001 |
| 0.2                    | 0.2999    | 0.0434     | 0.1098 | <0.0001 | 0.3079                    | 0.0432     | 0.0882 | <0.0001 |
| 0.4                    | 0.2999    | 0.0434     | 0.1098 | <0.0001 | 0.3079                    | 0.0432     | 0.0882 | <0.0001 |
| 0.6                    | 0.2999    | 0.0434     | 0.1099 | <0.0001 | 0.308                     | 0.0432     | 0.0883 | <0.0001 |
| 0.8                    | 0.2999    | 0.0434     | 0.1099 | <0.0001 | 0.308                     | 0.0432     | 0.0884 | <0.0001 |
| 1                      | 0.2999    | 0.0434     | 0.11   | <0.0001 | 0.308                     | 0.0432     | 0.0884 | <0.0001 |
| <b>Reaction Time</b>   |           |            |        |         |                           |            |        |         |
| 0                      | 0.1857    | 0.0601     | 0.0874 | 0.004   | 0.1891                    | 0.0656     | 0.0979 | 0.007   |
| 0.2                    | 0.1857    | 0.0601     | 0.0875 | 0.004   | 0.1891                    | 0.0656     | 0.098  | 0.007   |
| 0.4                    | 0.1857    | 0.0601     | 0.0876 | 0.004   | 0.1891                    | 0.0656     | 0.098  | 0.007   |
| 0.6                    | 0.1857    | 0.0601     | 0.0877 | 0.004   | 0.1892                    | 0.0656     | 0.0981 | 0.007   |
| 0.8                    | 0.1857    | 0.0601     | 0.0878 | 0.004   | 0.1892                    | 0.0656     | 0.0982 | 0.007   |
| 1                      | 0.1857    | 0.0601     | 0.0878 | 0.004   | 0.1892                    | 0.0656     | 0.0983 | 0.007   |

Std. Err., standard error of Hedges'g; Tau.sq, tau squared.

**Table S2: Sensitivity to correlation between conditions in within-subjects experiments**

|                              | Hedges' g | CIL   | CIU   | df   | p       | I <sup>2</sup> |
|------------------------------|-----------|-------|-------|------|---------|----------------|
| <b>r = 0.3</b>               |           |       |       |      |         |                |
| Outcome-Based All            | 0.287     | 0.209 | 0.366 | 95   | <0.0001 | 57.63          |
| Hypothesis-Based All         | 0.308     | 0.229 | 0.387 | 82   | <0.0001 | 56.22          |
| Outcome-Based Performance    | 0.298     | 0.21  | 0.386 | 79   | <0.0001 | 57.16          |
| Hypothesis-Based Performance | 0.304     | 0.215 | 0.393 | 69   | <0.0001 | 54.9           |
| Outcome-Based RT             | 0.183     | 0.061 | 0.304 | 32   | 0.005   | 51.31          |
| Hypothesis-Based RT          | 0.183     | 0.049 | 0.317 | 27.6 | 0.009   | 54.52          |
| <b>r = 0.7</b>               |           |       |       |      |         |                |
| Outcome-Based All            | 0.284     | 0.209 | 0.359 | 95   | <0.0001 | 76.66          |
| Hypothesis-Based All         | 0.302     | 0.225 | 0.379 | 82   | <0.0001 | 76.31          |
| Outcome-Based Performance    | 0.297     | 0.212 | 0.381 | 73   | <0.0001 | 76.26          |
| Hypothesis-Based Performance | 0.296     | 0.209 | 0.383 | 69   | <0.0001 | 75.16          |
| Outcome-Based RT             | 0.188     | 0.065 | 0.311 | 32.1 | 0.004   | 74.5           |
| Hypothesis-Based RT          | 0.193     | 0.059 | 0.327 | 28   | 0.006   | 77.82          |

CIL, 95% confidence interval lower bound; CIU, 95% confidence interval upper bound; df, degrees of freedom; RT, reaction time.

**Table S3: Summary of Hypothesis-based analysis results**

| Analysis                         | Hedges' g | CIL   | CIU   | df   | p        | I <sup>2</sup> | N  | k   |
|----------------------------------|-----------|-------|-------|------|----------|----------------|----|-----|
| All                              | 0.316     | 0.239 | 0.392 | 82   | <0.0001  | 64.4           | 83 | 213 |
| All (outliers removed)           | 0.304     | 0.236 | 0.373 | 82   | < 0.0001 | 54.83          | 83 | 201 |
| Performance                      | 0.308     | 0.222 | 0.394 | 69   | <0.0001  | 62.81          | 70 | 155 |
| Performance (outliers removed)   | 0.289     | 0.211 | 0.367 | 69   | <0.0001  | 56.59          | 70 | 146 |
| Reaction Time                    | 0.189     | 0.055 | 0.323 | 27.8 | 0.007    | 65.67          | 30 | 53  |
| Reaction Time (outliers removed) | 0.146     | 0.049 | 0.243 | 22.5 | 0.005    | 20.98          | 27 | 48  |

CIL, 95% confidence interval lower bound; CIU, 95% confidence interval upper bound; df, degrees of freedom; N, number of studies; k, number of experiments; RT, reaction time.

**Table S4: Effects of tACS on All outcomes by cognitive domains**

| Domain                        | Hedges' g | CIL    | CIU   | df    | p      | I <sup>2</sup> | N  | k  |
|-------------------------------|-----------|--------|-------|-------|--------|----------------|----|----|
| <b>Before outlier removal</b> |           |        |       |       |        |                |    |    |
| Working Memory                | 0.239     | 0.134  | 0.344 | 19.77 | 0.0001 | 48.4           | 22 | 67 |
| Long-Term Memory              | 0.274     | 0.128  | 0.42  | 25.2  | 0.001  | 63.31          | 27 | 56 |
| Attention                     | 0.293     | 0.058  | 0.528 | 6.1   | 0.022  | 50.53          | 8  | 21 |
| Executive Control             | 0.493     | 0.221  | 0.765 | 13.71 | 0.002  | 80.55          | 15 | 25 |
| Intelligence                  | 0.376     | 0.156  | 0.597 | 5.34  | 0.007  | 26.68          | 7  | 15 |
| Motor Learning                | -0.067    | -0.528 | 0.395 | 7.84  | 0.747  | 74.19          | 9  | 22 |
| Motor Memory                  | 0.193     | -0.101 | 0.488 | 10.8  | 0.176  | 74.74          | 12 | 39 |
| Learning                      | 0.624     | -0.728 | 1.976 | 3     | 0.238  | 91.43          | 4  | 7  |
| Decision-Making               | -0.071    | -0.413 | 0.27  | 1     | 0.23   | 0              | 2  | 2  |
| <b>After outlier removal</b>  |           |        |       |       |        |                |    |    |
| Working Memory                | 0.197     | 0.106  | 0.288 | 19.18 | 0.0002 | 30.44          | 22 | 63 |
| Long-Term Memory              | 0.256     | 0.132  | 0.38  | 23.81 | 0.0003 | 49.99          | 26 | 52 |
| Attention                     | 0.318     | 0.151  | 0.486 | 4.98  | 0.005  | 20.45          | 8  | 20 |
| Executive Control             | 0.563     | 0.318  | 0.808 | 12.56 | 0.0003 | 74.01          | 14 | 24 |
| Intelligence                  | 0.38      | 0.18   | 0.590 | 5.26  | 0.004  | 16.73          | 7  | 14 |
| Motor Learning                | -0.06     | -0.321 | 0.202 | 5.48  | 0.591  | 48.48          | 7  | 19 |
| Motor Memory                  | 0.192     | -0.004 | 0.388 | 10.44 | 0.054  | 53.16          | 12 | 37 |

CIL, 95% confidence interval lower bound; CIU, 95% confidence interval upper bound; df, degrees of freedom; N, number of studies; k, number of experiments. Further testing with outlier removal was not performed in the Learning and Decision-Making domains due to the low degrees of freedom..

**Table S5: Effects of tACS on Performance outcomes by cognitive domains**

| <b>Domain</b>                 | <b>Hedges' g</b>            | <b>CIL</b> | <b>CIU</b> | <b>df</b> | <b>p</b> | <b>I<sup>2</sup></b> | <b>N</b> | <b>k</b> |
|-------------------------------|-----------------------------|------------|------------|-----------|----------|----------------------|----------|----------|
| <b>Before outlier removal</b> |                             |            |            |           |          |                      |          |          |
| Working Memory                | 0.265                       | 0.128      | 0.402      | 18.13     | 0.001    | 56.92                | 20       | 53       |
| Long-Term Memory              | 0.28                        | 0.131      | 0.43       | 25.23     | 0.001    | 64.07                | 27       | 55       |
| Attention                     | 0.319                       | -0.002     | 0.64       | 6.45      | 0.051    | 63.71                | 8        | 14       |
| Executive Control             | 0.505                       | 0.124      | 0.885      | 9.83      | 0.015    | 83.38                | 11       | 15       |
| Intelligence                  | 0.364                       | -0.064     | 0.792      | 3.63      | 0.076    | 51.69                | 5        | 11       |
| Motor Learning                | 0.034                       | -0.589     | 0.658      | 2.85      | 0.868    | 42.79                | 4        | 10       |
| Motor Memory                  | 0.223                       | 0.003      | 0.442      | 5.42      | 0.048    | 18.52                | 7        | 15       |
| Learning                      | 0.624                       | -0.728     | 1.976      | 3         | 0.238    | 91.43                | 4        | 7        |
| Decision-Making               | -0.071                      | -0.413     | 0.27       | 1         | 0.23     | 0                    | 2        | 2        |
| <b>After outlier removal</b>  |                             |            |            |           |          |                      |          |          |
| Working Memory                | 0.216                       | 0.093      | 0.339      | 17.16     | 0.002    | 45.14                | 19       | 50       |
| Long-Term Memory              | 0.262                       | 0.135      | 0.389      | 23.87     | 0.0003   | 51.42                | 26       | 51       |
| Attention                     | 0.361                       | 0.118      | 0.605      | 5.54      | 0.012    | 35.85                | 8        | 13       |
| Executive Control             | 0.608                       | 0.265      | 0.951      | 8.72      | 0.003    | 75.72                | 10       | 14       |
| Motor Memory                  | <i>no outliers detected</i> |            |            |           |          |                      |          |          |

CIL, 95% confidence interval lower bound; CIU, 95% confidence interval upper bound; df, degrees of freedom; N, number of studies; k, number of experiments. Further testing with outlier removal was not performed in the Intelligence, Motor Learning, Learning and Decision-Making domains due to the low degrees of freedom..

**Table S6: Effects of tACS on Reaction Time outcomes by cognitive domains**

| Domain                        | Hedges' g                   | CIL    | CIU    | df    | p      | I <sup>2</sup> | N  | k  |
|-------------------------------|-----------------------------|--------|--------|-------|--------|----------------|----|----|
| <b>Before outlier removal</b> |                             |        |        |       |        |                |    |    |
| Working Memory                | 0.069                       | -0.058 | 0.195  | 7.46  | 0.243  | 0              | 10 | 14 |
| Attention                     | 0.238                       | 0.114  | 0.361  | 1.78  | 0.016  | 0              | 4  | 7  |
| Executive Control             | 0.315                       | -0.084 | 0.713  | 4.9   | 0.098  | 72.69          | 6  | 10 |
| Intelligence                  | 0.368                       | 0.087  | 0.648  | 1.97  | 0.03   | 0              | 3  | 4  |
| Motor Learning                | -0.12                       | -0.87  | 0.629  | 4.93  | 0.696  | 80.35          | 6  | 12 |
| Motor Memory                  | 0.202                       | -0.253 | 0.657  | 7.93  | 0.336  | 82.44          | 9  | 24 |
| <b>After outlier removal</b>  |                             |        |        |       |        |                |    |    |
| Working Memory                | <i>no outliers detected</i> |        |        |       |        |                |    |    |
| Executive Control             | 0.193                       | 0.221  | -0.182 | 0.569 | 54.007 | 3.759          | 5  | 9  |
| Motor Learning                | 0.077                       | 0.735  | -0.519 | 0.673 | 72.316 | 3.883          | 5  | 10 |
| Motor Memory                  | 0.124                       | -0.152 | 0.4    | 6.8   | 0.321  | 64.13          | 8  | 22 |

CIL, 95% confidence interval lower bound; CIU, 95% confidence interval upper bound; df, degrees of freedom; N, number of studies; k, number of experiments. The Long-term Memory, Learning and Decision-Making domains did not have sufficient number of RT effects for analysis. Further testing for outlier removal was not performed for Attention and Intelligence domains due to low degrees of freedom.

**Table S7: Effects of tACS along the hypothesized direction on All outcomes by cognitive domains**

| <b>Domain</b>                 | <b>Hedges' g</b> | <b>CIL</b> | <b>CIU</b> | <b>df</b> | <b>p</b> | <b>I<sup>2</sup></b> | <b>N</b> | <b>k</b> |
|-------------------------------|------------------|------------|------------|-----------|----------|----------------------|----------|----------|
| <b>Before outlier removal</b> |                  |            |            |           |          |                      |          |          |
| Working Memory                | 0.267            | 0.133      | 0.401      | 16.94     | 0.001    | 57.76                | 19       | 64       |
| Long-Term Memory              | 0.275            | 0.138      | 0.413      | 23.59     | < 0.001  | 58.04                | 26       | 48       |
| Attention                     | 0.064            | -0.164     | 0.293      | 6.12      | 0.519    | 49.94                | 8        | 22       |
| Executive Control             | 0.549            | 0.260      | 0.837      | 10.69     | 0.002    | 76.88                | 12       | 22       |
| Intelligence                  | 0.341            | 0.096      | 0.585      | 4.38      | 0.017    | 30.69                | 6        | 13       |
| Motor Learning                | 0.129            | -0.966     | 1.225      | 2.99      | 0.731    | 84.73                | 4        | 6        |
| Motor Memory                  | 0.434            | 0.121      | 0.746      | 4.87      | 0.016    | 53.80                | 6        | 14       |
| Learning                      | 0.605            | -0.566     | 1.777      | 3         | 0.199    | 90.80                | 4        | 9        |
| Decision-Making               | 0.332            | -3.369     | 4.033      | 1         | 0.458    | 74.92                | 2        | 4        |
| <b>After outlier removal</b>  |                  |            |            |           |          |                      |          |          |
| Working Memory                | 0.192            | 0.091      | 0.292      | 15.06     | 0.001    | 37.28                | 17       | 58       |
| Long-Term Memory              | 0.205            | 0.094      | 0.317      | 20.61     | 0.001    | 40.11                | 24       | 44       |
| Attention                     | 0.092            | -0.096     | 0.280      | 4.32      | 0.252    | 2.05                 | 8        | 21       |
| Executive Control             | 0.549            | 0.260      | 0.837      | 10.69     | 0.002    | 76.88                | 12       | 22       |
| Intelligence                  | 0.353            | 0.143      | 0.563      | 4.27      | 0.009    | 16.37                | 6        | 12       |
| Motor Learning                | 0.129            | -0.966     | 1.225      | 2.99      | 0.731    | 84.73                | 4        | 6        |
| Motor Memory                  | 0.354            | 0.174      | 0.534      | 4.68      | 0.004    | 7.93                 | 6        | 13       |

CIL, 95% confidence interval at lower bound; CIU, 95% confidence interval at upper bound; df, degrees of freedom; N, number of studies; k, number of experiments; Outlier detection was not performed for Learning and Decision-Making domains due to low degrees of freedom (< 4).

**Table S8: Effects of tACS along the hypothesized direction on Performance outcomes by cognitive domains**

| <b>Domain</b>                 | <b>Hedges' g</b> | <b>CIL</b> | <b>CIU</b> | <b>df</b> | <b>p</b> | <b>I<sup>2</sup></b> | <b>N</b> | <b>K</b> |
|-------------------------------|------------------|------------|------------|-----------|----------|----------------------|----------|----------|
| <b>Before outlier removal</b> |                  |            |            |           |          |                      |          |          |
| Working Memory                | 0.297            | 0.140      | 0.455      | 15.07     | 0.001    | 60.46                | 17       | 47       |
| Long-Term Memory              | 0.282            | 0.141      | 0.422      | 23.65     | < 0.001  | 59.06                | 26       | 47       |
| Attention                     | 0.141            | -0.077     | 0.360      | 5.25      | 0.159    | 26.24                | 8        | 12       |
| Executive Control             | 0.576            | 0.191      | 0.961      | 7.75      | 0.009    | 77.28                | 9        | 13       |
| Intelligence                  | 0.296            | -0.296     | 0.887      | 2.69      | 0.198    | 55.82                | 4        | 9        |
| Motor Learning                | -0.154           | -4.247     | 3.938      | 1         | 0.715    | 59.13                | 2        | 3        |
| Motor Memory                  | 0.357            | 0.063      | 0.777      | 2.78      | 0.072    | 16.54                | 4        | 6        |
| Learning                      | 0.596            | -0.593     | 1.785      | 3         | 0.209    | 91.17                | 4        | 8        |
| Decision-Making               | 0.332            | -3.369     | 4.033      | 1         | 0.458    | 74.92                | 2        | 4        |
| <b>After outlier removal</b>  |                  |            |            |           |          |                      |          |          |
| Working Memory                | 0.228            | 0.094      | 0.362      | 13.38     | 0.003    | 45.24                | 15       | 42       |
| Long-Term Memory              | 0.213            | 0.098      | 0.328      | 20.81     | 0.001    | 42.86                | 24       | 43       |
| Attention                     | 0.141            | -0.077     | 0.360      | 5.25      | 0.159    | 26.24                | 8        | 12       |
| Executive Control             | 0.576            | 0.191      | 0.961      | 7.75      | 0.009    | 77.28                | 9        | 13       |

CIL, 95% confidence interval at lower bound; CIU, 95% confidence interval at upper bound; df, degrees of freedom; N, number of studies; k, number of experiments; Outlier detection was not performed for Intelligence. Motor Learning, Motor Memory, Learning and Decision-Making domains due to low degrees of freedom (< 4).



**Table S9: Effects of tACS along the hypothesized direction on Reaction Time outcomes by cognitive domains**

| Domain                        | Hedges' g | CIL    | CIU   | df    | p     | I <sup>2</sup> | N | K  |
|-------------------------------|-----------|--------|-------|-------|-------|----------------|---|----|
| <b>Before outlier removal</b> |           |        |       |       |       |                |   |    |
| Working Memory                | 0.051     | -0.093 | 0.194 | 7.14  | 0.434 | 7.64           | 9 | 17 |
| Attention                     | -0.051    | -0.484 | 0.383 | 4.49  | 0.770 | 57.42          | 6 | 10 |
| Executive Control             | 0.282     | -0.235 | 0.800 | 3.93  | 0.203 | 75.72          | 5 | 9  |
| Intelligence                  | 0.368     | 0.087  | 0.648 | 1.97  | 0.030 | 0              | 3 | 4  |
| Motor Memory                  | 0.540     | -0.254 | 1.334 | 2.98  | 0.119 | 73.55          | 4 | 8  |
| <b>After outlier removal</b>  |           |        |       |       |       |                |   |    |
| Working Memory                | 0.038     | -0.082 | 0.159 | 7.029 | 0.474 | 0              | 9 | 16 |

CIL, 95% confidence interval at lower bound; CIU, 95% confidence interval at upper bound; df, degrees of freedom; N, number of studies; k, number of experiments; Prior to outlier removal, only one study examined RT measures in the Long-Term Memory, Motor Learning and Learning domains, while no study examined such metrics within the Decision-Making domain. Given the scarce data, these domains could not be examined. Among the domains examined, Executive Control, Intelligence and Motor Memory yielded low degrees of freedom (< 4), and were not subjected to further outlier removal. Within the Attention domain, 9 out of 10 effects were not identified as outliers, and the standardized residual procedure failed in computing the residual for the remaining effect. Given the absence of this information, as well as borderline acceptability of the degrees of freedom prior to outlier removal (df = 4.49), this domain was also not subjected to outlier removal.

**Table S10: Significant effects which become nonsignificant depending on whether clinical studies are included or not.**

|                                                                                                                   | With clinical studies                            | Without clinical studies                            |
|-------------------------------------------------------------------------------------------------------------------|--------------------------------------------------|-----------------------------------------------------|
| <b>Analysis: Effect Size Computation</b>                                                                          |                                                  |                                                     |
| Effect size for Performance measures, in the attention domain, before outlier removal                             | Hedges' $g = 0.319$ , $p = 0.051$<br>(Table S5)  | Hedges' $g = 0.275$ , $p = 0.09$<br>(Data File S09) |
| <b>Analyses: Meta-regression</b>                                                                                  |                                                  |                                                     |
| Influence of modulation intensity on RT measures, across all cognitive domains, after outlier removal             | Beta = $-0.148$ , $p = 0.048$<br>(Data File S04) | Beta = $-0.126$ , $p = 0.120$<br>(Data File S09)    |
| Influence of modulation frequency on All measures, in the working memory domain, after outlier removal            | Beta = $-0.006$ , $p = 0.032$<br>(Data File S06) | Beta = $-0.005$ , $p = 0.065$<br>(Data File S09)    |
| Influence of modulation intensity on All measures, in the executive control domain, after outlier removal         | Beta = $-0.136$ , $p = 0.556$<br>(Data File S08) | Beta = $-0.722$ , $p = 0.036$<br>(Data File S09)    |
| Influence of modulation intensity on Performance measures, in the executive control domain, after outlier removal | Beta = $-0.212$ , $p = 0.61$<br>(Data File S08)  | Beta = $-0.814$ , $p = 0.043$<br>(Data File S09)    |
| Influence of modulation intensity on RT measures, in the executive control domain, after outlier removal          | Beta = $-0.362$ , $p = 0.307$<br>(Data File S08) | Beta = $-0.966$ , $p = 0.03$<br>(Data File S09)     |

**Table S11: Effects of in-phase and anti-phase tACS**

| <b>Analysis</b>               | <b>Hedges' g</b> | <b>CIL</b> | <b>CIU</b> | <b>df</b> | <b>p</b> | <b>I<sup>2</sup></b> | <b>N</b> | <b>k</b> |
|-------------------------------|------------------|------------|------------|-----------|----------|----------------------|----------|----------|
| <b>Before outlier removal</b> |                  |            |            |           |          |                      |          |          |
| All (In-, Anti-Phase)         | 0.35             | 0.169      | 0.531      | 20.1      | 0.0006   | 72.42                | 22       | 62       |
| All In-Phase*                 | 0.317            | 0.103      | 0.531      | 17.3      | 0.006    | 75.89                | 19       | 41       |
| All Anti-Phase†               | 0.314            | 0.082      | 0.546      | 7.48      | 0.015    | 52.91                | 9        | 14       |
| Performance (In-, Anti-Phase) | 0.323            | 0.1        | 0.546      | 15.6      | 0.007    | 75.86                | 17       | 46       |
| Performance In-Phase*         | 0.27             | -0.007     | 0.547      | 12.8      | 0.055    | 80.27                | 14       | 29       |
| Performance Anti-Phase†       | 0.307            | 0.047      | 0.567      | 5.55      | 0.028    | 51.57                | 7        | 10       |
| RT (In-, Anti-Phase)          | 0.231            | -0.063     | 0.525      | 6.79      | 0.105    | 63.58                | 8        | 13       |
| RT In-Phase*                  | 0.217            | -0.079     | 0.514      | 6.75      | 0.126    | 60.88                | 8        | 9        |
| RT Anti-Phase†                | 0.242            | -0.322     | 0.805      | 2.94      | 0.263    | 53.18                | 4        | 4        |
| <b>After outlier removal</b>  |                  |            |            |           |          |                      |          |          |
| All (In-, Anti-Phase)         | 0.329            | 0.166      | 0.492      | 19.9      | 0.0004   | 67.61                | 22       | 59       |
| All In-Phase*                 | 0.293            | 0.102      | 0.484      | 17.2      | 0.005    | 71.29                | 19       | 38       |
| All Anti-Phase†               | 0.302            | 0.087      | 0.517      | 7.31      | 0.013    | 45.22                | 9        | 13       |
| Performance (In-, Anti-Phase) | 0.298            | 0.101      | 0.495      | 15.5      | 0.006    | 70.83                | 17       | 43       |
| Performance In-Phase*         | 0.252            | -0.002     | 0.506      | 12.8      | 0.052    | 77.69                | 14       | 27       |
| Performance Anti-Phase†       | 0.292            | 0.057      | 0.527      | 5.37      | 0.024    | 39.86                | 7        | 9        |
| RT (In-, Anti-Phase)          | 0.11             | -0.093     | 0.314      | 5.26      | 0.224    | 20.37                | 7        | 12       |
| RT In-Phase*                  | 0.079            | -0.104     | 0.261      | 4.95      | 0.316    | 0                    | 7        | 8        |

CIL, 95% confidence interval lower bound; CIU, 95% confidence interval upper bound; df, degrees of freedom; N, number of studies; k, number of experiments. \* In-phase tACS effect in experiments using modulation to improve functional outcome; † Anti-phase tACS effect in experiments using modulation to disrupt functional outcome.

**Table S12: Summary of results in older adults and clinical populations**

| <b>Analysis</b>               | <b>Hedges' g</b> | <b>CIL</b> | <b>CIU</b> | <b>df</b> | <b>p</b> | <b>I<sup>2</sup></b> | <b>N</b> | <b>k</b> |
|-------------------------------|------------------|------------|------------|-----------|----------|----------------------|----------|----------|
| <b>Older Adults</b>           |                  |            |            |           |          |                      |          |          |
| <i>Before outlier removal</i> |                  |            |            |           |          |                      |          |          |
| All                           | 0.37             | 0.121      | 0.619      | 10.8      | 0.008    | 73.84                | 12       | 28       |
| Performance                   | 0.422            | 0.14       | 0.704      | 9.79      | 0.008    | 72.99                | 11       | 19       |
| RT                            | 0.059            | -0.372     | 0.491      | 2.95      | 0.689    | 56.77                | 4        | 9        |
| <i>After outlier removal</i>  |                  |            |            |           |          |                      |          |          |
| All                           | 0.393            | 0.166      | 0.62       | 10.7      | 0.003    | 69.04                | 12       | 26       |
| Performance                   | 0.434            | 0.167      | 0.701      | 9.75      | 0.005    | 69.88                | 11       | 18       |
| <b>Clinical Populations</b>   |                  |            |            |           |          |                      |          |          |
| <i>Before outlier removal</i> |                  |            |            |           |          |                      |          |          |
| Symptoms                      | 0.493            | 0.462      | 0.524      | 2.71      | < 0.0001 | 0                    | 4        | 11       |
| All (excluding symptoms)      | 0.475            | 0.143      | 0.806      | 7.66      | 0.01     | 54.81                | 9        | 27       |
| Performance                   | 0.518            | 0.11       | 0.926      | 6.76      | 0.02     | 61.49                | 8        | 19       |
| RT                            | 0.244            | -0.744     | 1.23       | 1.63      | 0.3      | 0                    | 3        | 8        |
| <i>After outlier removal</i>  |                  |            |            |           |          |                      |          |          |
| All (excluding symptoms)      | 0.473            | 0.199      | 0.748      | 7.39      | 0.004    | 29.06                | 9        | 25       |
| Performance                   | 0.467            | 0.11       | 0.825      | 6.66      | 0.02     | 51.47                | 8        | 18       |

CIL, 95% confidence interval lower bound; CIU, 95% confidence interval upper bound; df, degrees of freedom; N, number of studies; k, number of experiments; RT, reaction time. Further testing for outlier removal was not performed for RT effects due to low degrees of freedom.
